# Supplementary material for: Aorta-to-Left Atrial Fistula Caused by Air Gun Pellet Cardiac Injury
Source: Springer Nature journal article supplement (doi:10.1007/s40119-014-0026-7), 2014-03-04
Supplement: MOESM1 [file 9339368]

- Aorta to left atrial fistula is rare and its causes can be congenital or acquired.
- We report a case of a 10 years old boy acquired aorta to left atrial fistula associated with an air gun pellet injury
- The patient was operated on following the detection of a ruptured sinus of valsalva aneurysm and aorta to left atrial fistula via echocardiography
- Our case is the first description of aorta to left atrial fistula caused by an air gun pellet injury

This summary slide represents the opinions of the authors. For a full list of acknowledgments and conflicts of interest for all authors of this article, please see the full text online. Copyright © The Authors 2014. Creative Commons Attribution Noncommercial License (CC BY-NC).
